# Supplementary material
Source: Elsevier journal article supplement (https://www.sciencedirect.com/science/article/pii/S0300289621001058)
Supplement: mmc1 [file S0300289621001058:mmc1.pdf]

## **Consequences of ICU readmission after lung transplantation: beyond the early postoperative period: SUPPLEMENTARY MATERIAL**

### *Study design*

Retrospective and single-centre study. We included all LT patients who were readmitted to the ICU beyond 30 days of the initial ICU discharge after the immediate postoperative period of lung transplantation, over a 6-year period (from January 1, 2011, to December 31, 2016). All patients were admitted to Vall d'Hebron University Hospital (HUVH), Barcelona (Spain), a large referral academic institution managing more than 1000 hospitalization beds and 80 critical care beds (e.g., general, trauma, burn, surgical), and serving a population of nearly 0,3 million. This study followed the recommendations of the Strengthening the Reporting of Observational Studies in Epidemiology (STROBE) guidelines for reporting observational studies <sup>14</sup>.

### *Immunosuppression protocol*

In the early postoperative period, LT patients received triple therapy with one calcineurin inhibitor (tacrolimus), one antiproliferative agent (mycophenolate), and corticosteroids. Patients received no induction therapy. In the case of renal failure, the calcineurin inhibitor (tacrolimus) was replaced by basiliximab, an interleukin-2 receptor antagonist. Subsequently, conventional immunosuppression maintenance therapy was based on triple-drug therapy for all patients: tacrolimus, mycophenolate, and corticosteroids. In the absence of chronic allograft dysfunction (CLAD), the dose of all immunosuppressive agents could be reduced. In the case of patients with renal failure or bronchiolitis obliterans syndrome, mammalian target of rapamycin (mTOR) inhibitors were introduced to reduce the dose of calcineurin inhibitor or even replace it.

### *Source of patients and data collection*

The HUVH Institutional Ethics Committee approved this study, and informed consent was waived due to its retrospective nature. All patients who underwent LT at HUVH were identified by retrospective analysis for electronic chart review. Immunosuppressive therapy and infectious disease antimicrobial prophylaxis were managed according to the standard protocol in all patients during the first ICU admission after LT. Postoperative management was performed by a dedicated multidisciplinary and experienced group of professionals, including critical care physicians, pneumologists, and nurses, implementing protocol-driven care. Following hospital discharge after LT, all patients were regularly followed once or twice per week for the first four weeks as outpatients and weekly for up to 3 months. Then, the follow-up was conducted as considered necessary by physicians on-charge. All ICU readmissions beyond the 30-day of the initial post-transplantation ICU discharge, between January 1, 2011, and July 31, 2016, were registered. All LT recipients initially readmitted to other hospitals in the same geographic area were early transferred to HUVH for management within 24 hours of admission. All patients were followed-up for up to one year after ICU readmission. Patients who underwent lung retransplantation, prior or simultaneous organ transplantation, and patients with do-not-resuscitate or do-not-intubate orders were excluded. Demographic and clinical data were collected from the patients' medical charts and electronic records. Clinical data were recorded, including age, gender, indication for LT, the first second of forced expiration volume (FEV<sub>1</sub>) post-LT, the reason for ICU admission, acute severity scores (the Sequential Organ Failure Assessment [SOFA] <sup>15</sup> and Acute Physiology And Chronic Health Evaluation [APACHE] II <sup>16</sup> scores), chronic complications, predisposing conditions prior to ICU admission and supportive therapy during ICU admission. The hospital and ICU length of stay before and

after the index hospitalization for LT were also assessed. For patients with multiple readmissions to the ICU, individual readmissions were analyzed independently. Given the strict postoperative management and supervision of LT recipients, there were no missing data or losses during the follow-up.

### *Statistical Analyses*

We report the distribution of characteristics. To compare characteristics, we used the Chi-square or Fisher's exact test for categorical variables. We compared continuous variables using the Student's t-test or Mann–Whitney test, as appropriate. Multivariable analysis in the form of logistic regression (backward stepwise) was conducted to evaluate associations between risk factors at ICU readmission and 1-year mortality. All variables showing statistically significant differences between survivors and nonsurvivors were included in the Cox regression model.

Finally, an analysis was conducted to establish the increases in the risk of death associated with each independent variable. For that purpose, the variables regarding patients' evolution during ICU stay that were different between 1-year survivors and nonsurvivors were added one at a time to the model. We also obtained predicted probabilities of 1-year mortality according to the presence or absence of these variables while holding other variables included in the model at its mean. Statistical analyses were performed using STATA 14 software (Stata Corp. Stata Statistical Software: Release 14. Statistical Software. College Station, TX: StataCorp LP). A two-sided p-value of 0.05 or less was considered statistically significant.

**TABLE S1.** Microbiological aetiology in patients admitted for respiratory tract infection or septic shock

| Type of isolation |                     | N=57       |
|-------------------|---------------------|------------|
|                   | No isolation        | 20 (35.1%) |
|                   | Positive culture    | 37 (64.9%) |
|                   | Multidrug-resistant | 12 (32.4%) |
|                   | GPC                 | 5 (13.5%)  |
|                   | GNB                 | 22 (59.5%) |
|                   | Viral               | 5 (13.5%)  |
|                   | Fungal              | 5 (13.5%)  |

GPC: Gram positive cocci, GNB: Gram negative bacilli.

**TABLE S2.** Characteristics of lung transplant complications prior to ICU readmission

| Complications of lung transplant prior to ICU readmission (single admissions) |                                 | All (N=81) | Nonsurvivors (N= 47) | Survivors (N= 34) | p-value |
|-------------------------------------------------------------------------------|---------------------------------|------------|----------------------|-------------------|---------|
|                                                                               | Lung infection                  | 63 (77.8%) | 42 (89.4%)           | 21 (66.8%)        | 0.003   |
|                                                                               | Acute rejection                 | 36 (44.4%) | 19 (40.4%)           | 17 (50%)          | 0.392   |
|                                                                               | Type of acute rejection         |            |                      |                   | 0.647   |
|                                                                               | Humoral                         | 3 (8.3%)   | 2 (10%)              | 1 (5.9%)          |         |
|                                                                               | Cellular                        | 33 (91.7%) | 18 (90%)             | 16 (94.1%)        |         |
|                                                                               | Severity of cellular rejection: |            |                      |                   | 0.481   |
|                                                                               | A1                              | 5 (14.2%)  | 2 (11.8%)            | 3 (18.6%)         |         |
|                                                                               | A2                              | 14 (42.4%) | 9 (52.9%)            | 5 (31.3%)         |         |
|                                                                               | A3                              | 11 (33.3%) | 4 (23.5%)            | 7 (43.8%)         |         |
|                                                                               | A4                              | 3 (9.1%)   | 2 (11.8%)            | 1 (6.3%)          |         |
|                                                                               | PGD                             | 15 (18.5%) | 10 (21.3%)           | 5 (14.5%)         | 0.452   |
|                                                                               | Severity of PGD                 |            |                      |                   | 0.281   |
|                                                                               | I                               | 1 (6.7%)   | 1 (10%)              | 0                 |         |
|                                                                               | II                              | 1 (6.7%)   | 0                    | 1 (20%)           |         |
|                                                                               | III                             | 13 (86.6%) | 9 (90%)              | 4 (80%)           |         |
|                                                                               | CLAD                            | 19 (23.5%) | 15 (31.9%)           | 4 (11.8%)         | 0.035   |
|                                                                               | Type of CLAD                    |            |                      |                   | 0.750   |
|                                                                               | RAS                             | 13 (68.4%) | 10 (66.7%)           | 3 (75%)           |         |
|                                                                               | BOS                             | 6 (31.6%)  | 5 (33.3%)            | 1 (25%)           |         |
|                                                                               | CMV                             | 17 (21%)   | 12 (25.5%)           | 5 (14.7%)         | 0.238   |

PGD: Primary graft dysfunction; CLAD: Chronic lung allograft dysfunction; RAS Restrictive allograft syndrome; BOS: Bronchiolitis obliterans syndrome; CMV: cytomegalovirus

**TABLE S3.** Characteristics of 1-year nonsurvivors and survivors during ICU stay

| Variables                                         |                                                                    | Nonsurvivors<br>(n = 60) | Survivors<br>(n = 37) | p-value |
|---------------------------------------------------|--------------------------------------------------------------------|--------------------------|-----------------------|---------|
| At ICU readmission                                |                                                                    |                          |                       |         |
|                                                   | APACHE II <sup>†</sup>                                             | 17 (1)                   | 14 (1)                | 0.003   |
|                                                   | SOFA <sup>*</sup>                                                  | 4 (0)                    | 5 (1)                 | 0.052   |
|                                                   | Baseline respiratory variables                                     |                          |                       |         |
|                                                   | PaO <sub>2</sub> /F <sub>I</sub> O <sub>2</sub> ratio <sup>∞</sup> | 209 (15)                 | 235 (19)              | 0.266   |
|                                                   | Respiratory rate (bpm)                                             | 29 (1)                   | 27 (1)                | 0.098   |
|                                                   | Chest X ray                                                        |                          |                       |         |
|                                                   | Bilateral infiltrates                                              | 28 (46.7%)               | 12 (32.4%)            | 0.167   |
|                                                   | Number of quadrants affected                                       | 2(0-4)                   | 1 (0-3)               | 0.045   |
|                                                   | Lactate (nmol/L)                                                   | 1.7 (0.2)                | 2 (0.47)              | 0.449   |
| Respiratory supportive therapy at ICU readmission |                                                                    |                          |                       | 0.149   |
|                                                   | Conventional oxygen therapy                                        | 4 (6.7%)                 | 7 (18.9%)             |         |
|                                                   | HFNC                                                               | 31 (51.7%)               | 19 (51.4%)            |         |
|                                                   | NIV                                                                | 7 (11.7%)                | 1 (2.7%)              |         |
|                                                   | IMV                                                                | 18 (30%)                 | 10 (27%)              |         |
| Evolution during their course in the ICU          |                                                                    |                          |                       |         |
|                                                   | Sepsis                                                             | 21 (35%)                 | 10 (27%)              | 0.504   |
|                                                   | Need of vasopressors                                               | 24 (40%)                 | 7 (18.9%)             | 0.043   |
|                                                   | Renal failure                                                      | 33 (55%)                 | 16 (43.2%)            | 0.300   |
|                                                   | Renal replacement therapy                                          | 13 (21.7%)               | 2(5.4%)               | 0.042   |
|                                                   | Need for IMV                                                       | 52 (86.7%)               | 14 (37.8%)            | <0.001  |
|                                                   | Days of IMV                                                        | 15 (4-29)                | 9 (1-18)              | 0.228   |
| Length of stay                                    |                                                                    |                          |                       |         |
|                                                   | ICU                                                                | 13 (3-25)                | 6 (3-12)              | 0.074   |
|                                                   | Hospital                                                           | 19 (7-35)                | 26 (18-43)            | 0.048   |

\* Plus-minus values are means  $\pm$ SD. Other quantitative values are expressed as median and interquartile range 25-75% (median (IQR)).

ICU denotes intensive care unit, SOFA sequential organ failure assessment score, APACHE II Acute Physiology and Chronic Health Evaluation II score, HFNC high-flow nasal cannula, NIV noninvasive mechanical ventilation, IMV invasive mechanical ventilation.

\* SOFA scores range from 0 to 24, with higher scores indicating more severe organ failure.

† The Acute physiology and Chronic Health Evaluation score ranges from 0-71, with higher scores indication more severe acute condition.

$\infty$  *PaO<sub>2</sub>/FiO<sub>2</sub> ratio* is the ratio of arterial oxygen partial pressure (PaO<sub>2</sub> in mmHg) to fractional inspired oxygen (FiO<sub>2</sub>) expressed as a fraction, which is a commonly used indicator of lung function in critically ill patients.

**TABLE S4.** Multivariate analysis of risk factors at ICU readmission for 1-year mortality

| Variables (step 2)                          | Odds ratio | 95% CI       | p-value |
|---------------------------------------------|------------|--------------|---------|
| LRTI                                        | 3.49       | 0.86 - 14.16 | 0.081   |
| Number of quadrants affected in chest X-ray | 1.52       | 1.05 - 2.21  | 0.027   |
| FEV <sub>1</sub> *                          | 0.96       | 0.93 - 0.99  | 0.028   |
| APACHE II †                                 | 1.17       | 1.04 - 1.32  | 0.009   |

Variables entered in step 1: LTRI, CLAD, FEV<sub>1</sub>, number of quadrants affected in chest X-ray and APACHE II score.

LTRI denotes lower respiratory tract infection, CLAD chronic lung allograft dysfunction FEV<sub>1</sub> forced expiratory volume in one second, APACHE II Acute Physiology and Chronic Health Evaluation II score.

\* FEV<sub>1</sub> is the volume of air that can forcibly be blown out in first 1 second, after full inspiration, depend mainly on sex and age. Values of between 80% and 120% of the average value are considered normal.

† The Acute physiology and Chronic Health Evaluation score ranges from 0-71, with higher scores indication more severe acute condition.



**Table S5.** Addition of different variables, once at a time, to the model presented.

| Variables added to the model | Odds ratio | 95% CI        | p-value |
|------------------------------|------------|---------------|---------|
| Mechanical ventilation       | 35.67      | 7.73 - 164.53 | < 0.001 |
| Need for vasopressors        | 1.12       | 0.29 - 4.37   | 0.869   |
| Renal replacement therapy    | 1.49       | 0.22 - 10.10  | 0.680   |

**TABLE S6.** Differences in predicted probabilities of 1-year mortality according to each variable.

| Variable                  |     | Predicted probability of one-year mortality | 95% CI  |
|---------------------------|-----|---------------------------------------------|---------|
| Mechanical ventilation    |     |                                             |         |
|                           | Yes | 84%                                         | 72-96%  |
|                           | No  | 16%                                         | -02-34% |
| Need for vasopressors     |     |                                             |         |
|                           | Yes | 65%                                         | 40-90%  |
|                           | No  | 62%                                         | 47-78%  |
| Renal replacement therapy |     |                                             |         |
|                           | Yes | 62%                                         | 48-76%  |
|                           | No  | 71%                                         | 35-107% |

Differences in predicted probabilities of 1-year mortality after ICU admission according to the need for mechanical ventilation, renal replacement therapy and vasopressors while holding other variables included in the model at its mean.
